# Supplementary material
Source: PubMed Central journal article supplement (PMC3517241)
Supplement: supp_tpc.112.102608_tpc102608supplemental.pdf [file supp_tpc.112.102608_tpc102608supplemental.pdf]

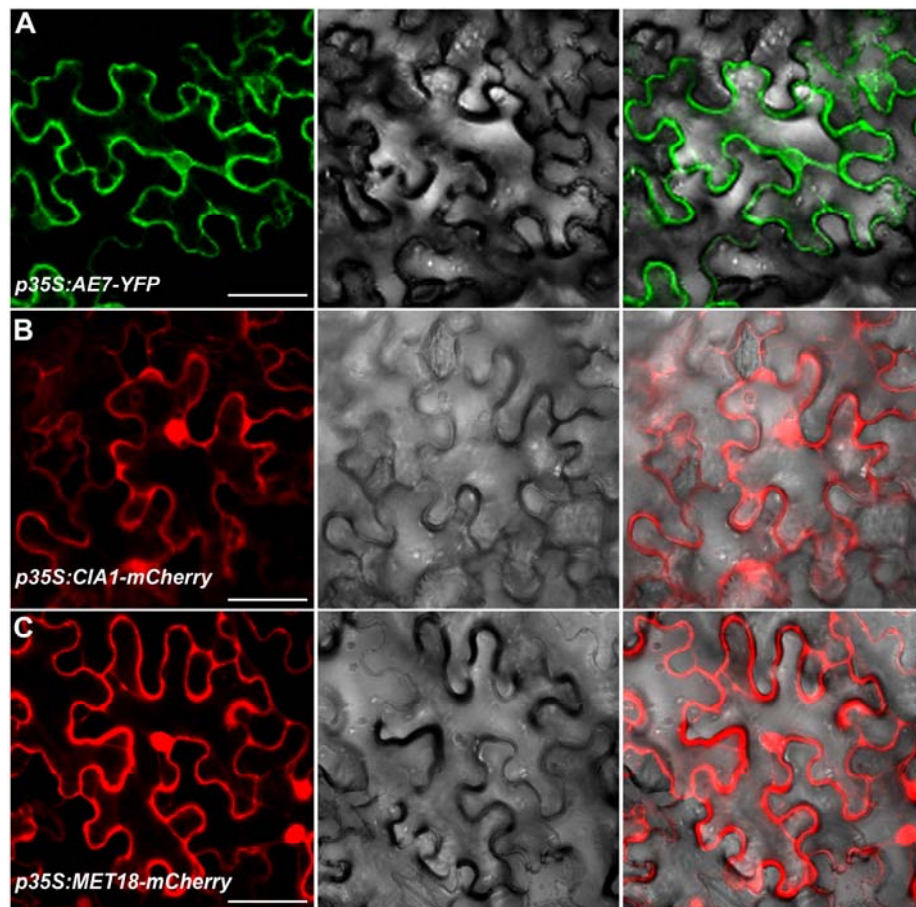

**Supplemental Figure 1.** Subcellular localization of AE7, CIA1 and MET18.

(A-C) Tobacco leaves were infiltrated with *p35S:AE7-YFP* (A), *p35S: CIA1-mCherry* (B) or *p35S:MET18-mCherry* (C), respectively. AE7-YFP (A), CIA1-mCherry (B) or MET18-mCherry (C) signals were detected in both nuclei and cytoplasm. Bars in (A-C), 50  $\mu\text{m}$ .

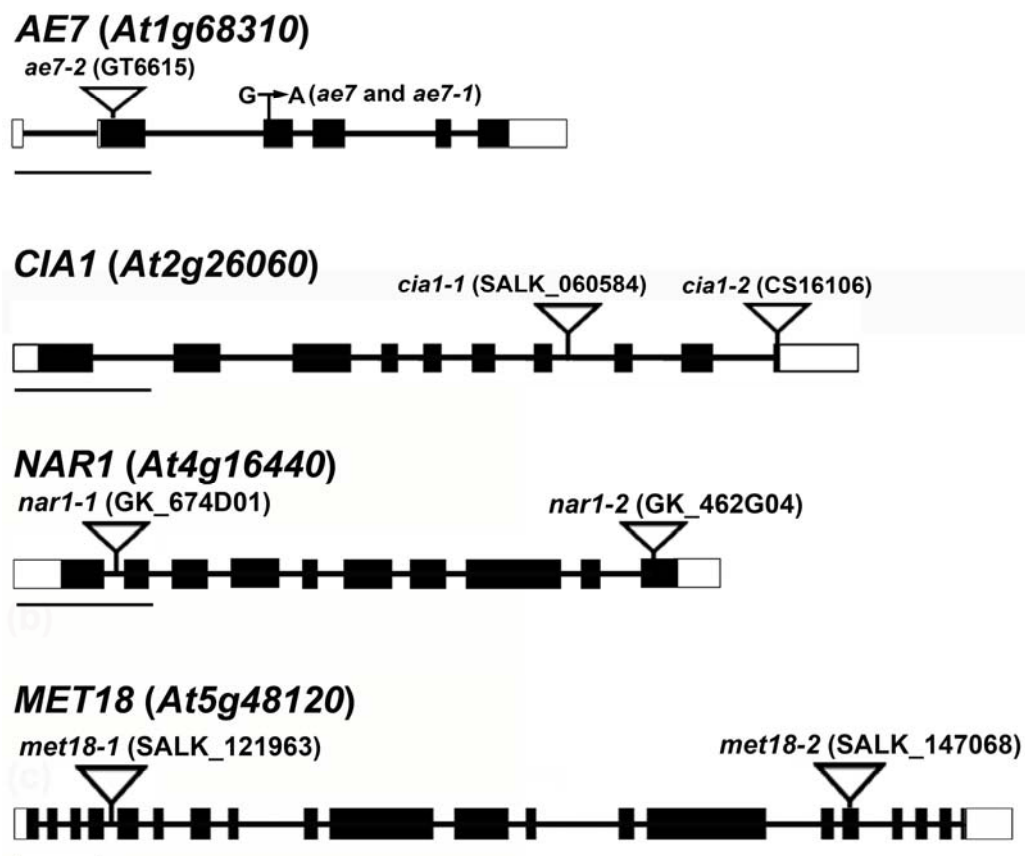

**Supplemental Figure 2.** Diagram of gene structures of *AE7*, *CIA1*, *NAR1* and *MET18*. Black and white boxes symbolize exons and untranslated regions, respectively, and horizontal lines indicate introns. Triangles show positions where a transposon (in *ae7-2*) or T-DNA (in *cia1-1*, *cia1-2*, *nar1-1*, *nar1-2*, *met18-1*, and *met18-2*) were located in the gene. Bars, 500 bp.

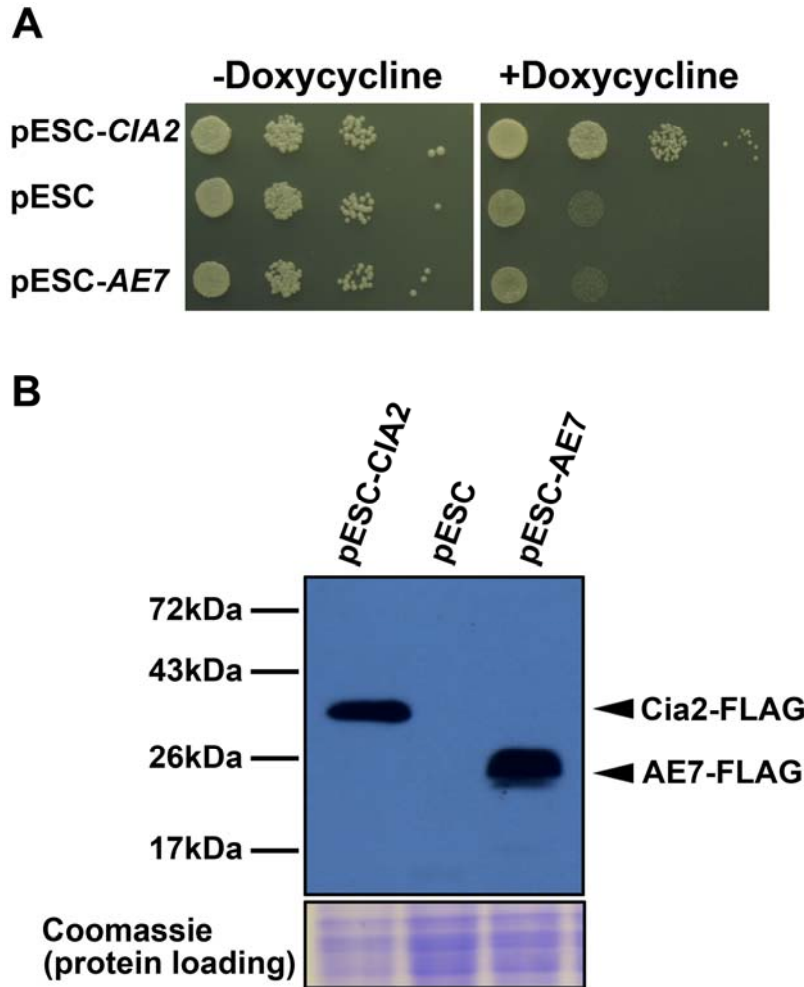

**Supplemental Figure 3.** *Arabidopsis AE7* failed to rescue the growth of a yeast strain with a doxycycline-repressable *CIA2/YHR122W* gene. (A) The growth of a yeast strain with a doxycycline-repressable *CIA2/YHR122W* gene could not be rescued by expression of the *Arabidopsis AE7* gene. Ten-fold serial dilutions of yeast were grown in the absence (left panel) or presence (right panel) of 10  $\mu\text{g/ml}$  doxycycline that can down-regulate the *CIA2/YHR122W* gene. Cells were transformed with the pESC plasmid containing another copy of the yeast *CIA2* gene fused in-frame with a FLAG-tag (pESC-*CIA2*), and empty plasmid (pESC) or the *Arabidopsis AE7* gene with a FLAG-tag sequence (pESC-*AE7*). (B) Western blot analysis using the Anti-FLAG antibody confirmed the accumulation of Cia2-FLAG and AE7-FLAG proteins.

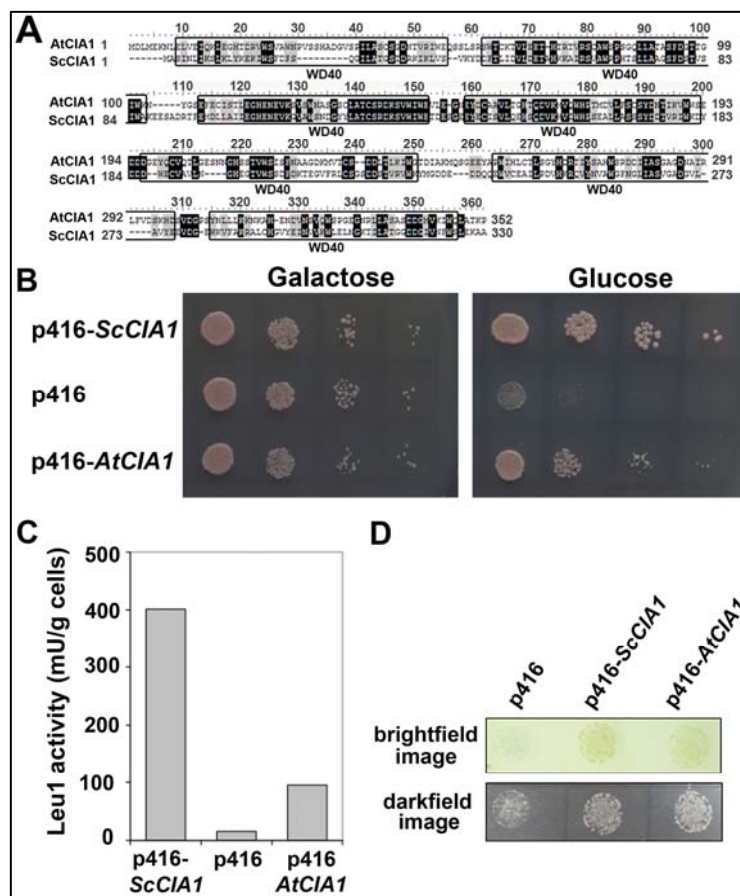

**Supplemental Figure 4.** *Arabidopsis CIA1* rescued the yeast Gal-*CIA1* mutant. (A) Alignment of the full-length amino acid sequences of AtCIA1 and ScCIA1. (B) The yeast Gal-*CIA1* cells were transformed with the yeast expression vector p416 containing the yeast *CIA1* gene (p416-*ScCIA1*), p416 only, or the coding sequence of *Arabidopsis CIA1* (p416-*AtCIA1*). Cells were grown at 30°C on rich media containing galactose (left) or glucose (right) to induce or repress, respectively, genomic *CIA1* expression. (C) Cell extracts of the transformants described in (B) were analysed for the activity of Leu1, a cytosolic Fe-S enzyme. (D) Cells as in (B) were tested for the activity of sulfite reductase. Yeast was spotted on minimal agar medium with glucose to deplete expression of the genomic copy of *CIA1*. The plate also contained 0.1% (w/v) bismuth ammonium citrate and 0.03% (w/v) sulfite. Sulfite is reduced to sulfide by SiR, a [4Fe-4S] siroheme enzyme, which forms a brown precipitate with bismuth.

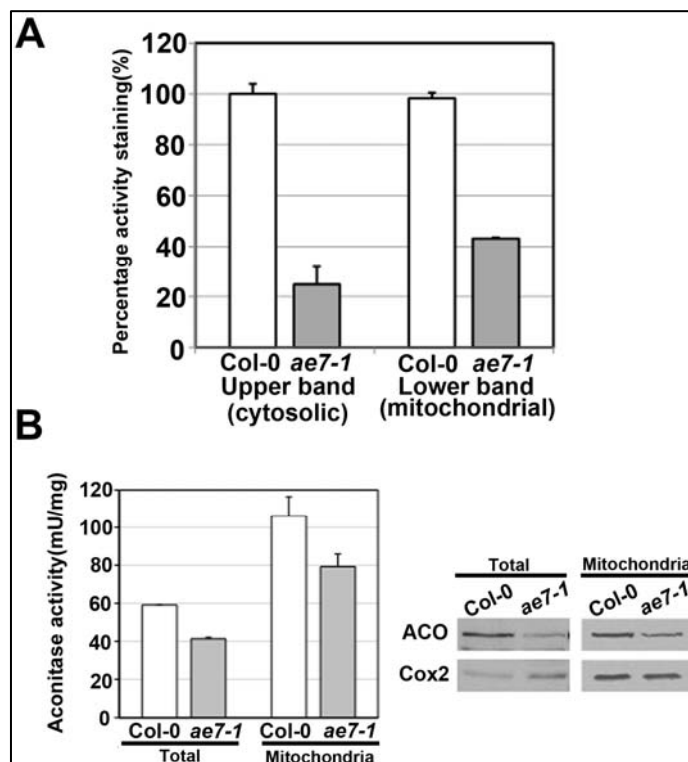

**Supplemental Figure 5.** Aconitase activity in wild type and *ae7-1* seedlings. (A) Quantification of in-gel aconitase activities. The in-gel activity staining in Figure 6A, top panel, was quantified using ImageJ software. (B) Aconitase activity and protein levels in total extract and purified mitochondria. Total proteins were extracted as for in-gel activity assays, except that hydroponically grown seedlings were used as plant material. Mitochondria were purified from 14-day old hydroponic seedlings, using differential centrifugation and Percoll gradients, as described previously (Sweetlove et al., 2007). Aconitase activity was measured as NADPH production in a coupled assay with isocitrate dehydrogenase. The same protein fractions were subjected to immunoblotting with specific antibodies against aconitase and Cox2. Cox2 is a subunit of Complex IV and serves as a mitochondrial marker.

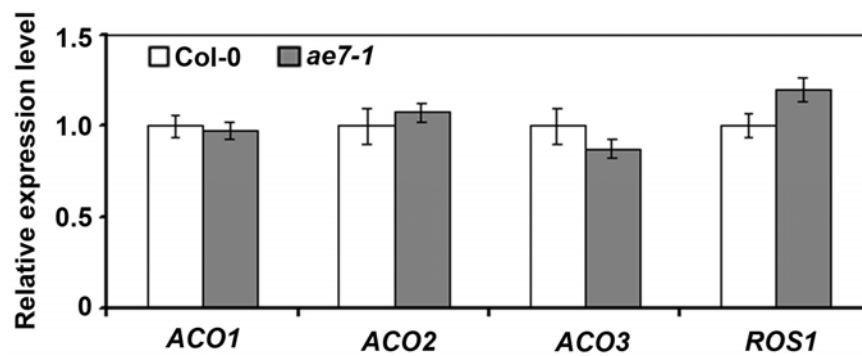

**Supplemental Figure 6.** qRT-PCR analysis of expressions of the *ACO* and *ROS1* genes. Total RNA prepared from 14-day-old seedlings was amplified by RT-PCR. All values were normalized against the expression level of the *ACTIN* genes. Triplicate repeats and three biological replicates were performed and the data are shown as the averages with s.d.

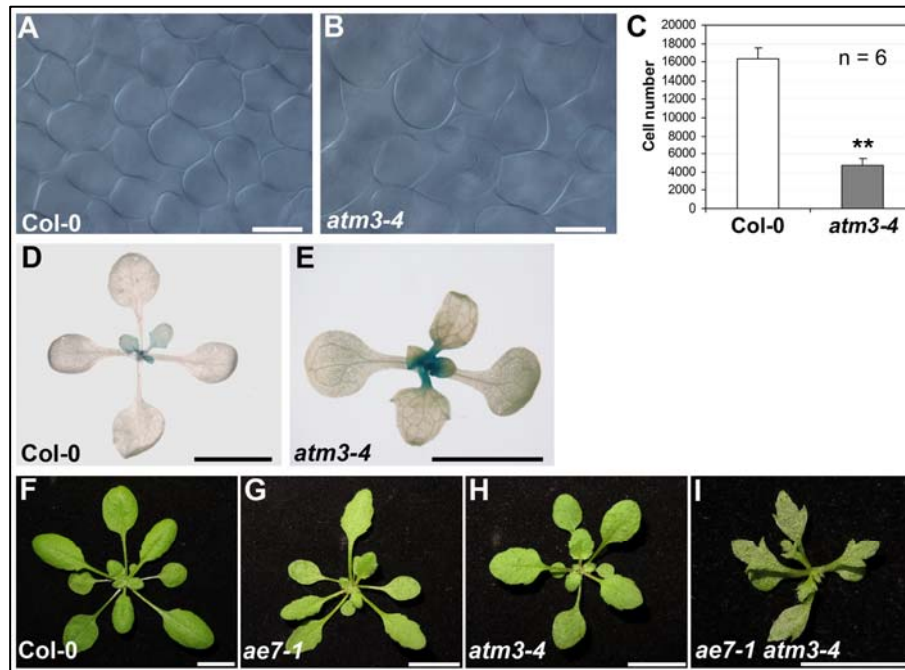

**Supplemental Figure 7.** The *atm3-4* mutant showed cell proliferation defects and a genetic interaction with *ae7-1*. (A-C) Compared with the wild type (A), the size of palisade cells in the first rosette leaf from 25-day-old *atm3-4* seedlings (B) is enlarged, while the number of palisade cells in *atm3-4* leaves is reduced (C). \* Significant statistical differences by t-test ( $P < 0.01$ ). (D, E) Histochemical localization of GUS activity in the shoot apex of 13-day-old wild type (D) and *atm3-4* (E) seedlings harboring the CYCB1;1:GUS reporter, respectively. (F-I) Genetic interaction between *ae7-1* and *atm3-4*. Compared with the wild type (F) or *ae7-1* (G) and *atm3-4* (H) single mutants, the *ae7-1 atm3-4* double mutant (I) exhibited enhanced developmental defects, including a diminutive plant size and serrated leaves. Bars in (A, B), 50 $\mu$ m; in (D, E), 0.5cm; in (F-I), 1 cm.

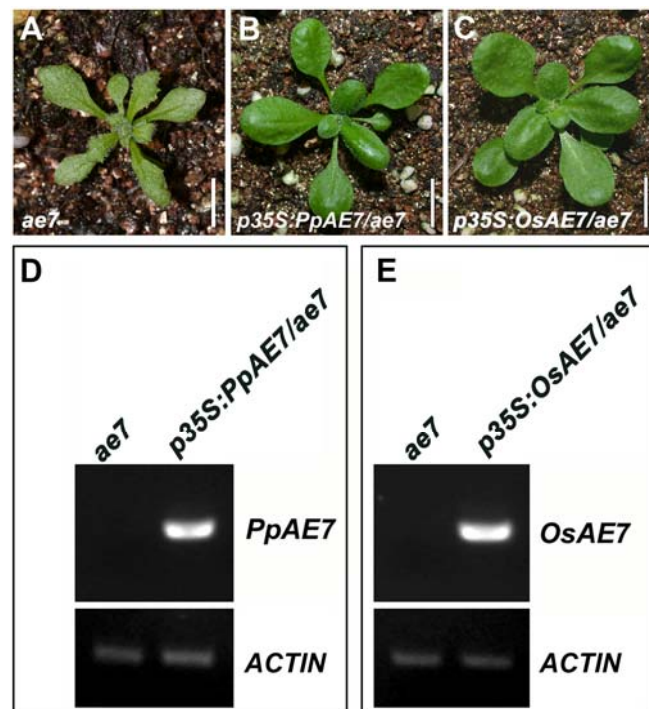

**Supplemental Figure 8.** The *ae7* phenotype was rescued by the moss (*Physcomitrella patens*) and rice (*Oryza sativa*) orthologues of *AE7*. (A) The *ae7* mutant. (B, C) The *ae7* mutant transformed with the *Physcomitrella patens* Pp-*AE7* (B) and rice Os-*AE7* (C). (D, E) RT-PCR to analyze the transcripts of the Pp-*AE7* and Os-*AE7* in the corresponding transgenic plants. Bars in (A-C), 1 cm.



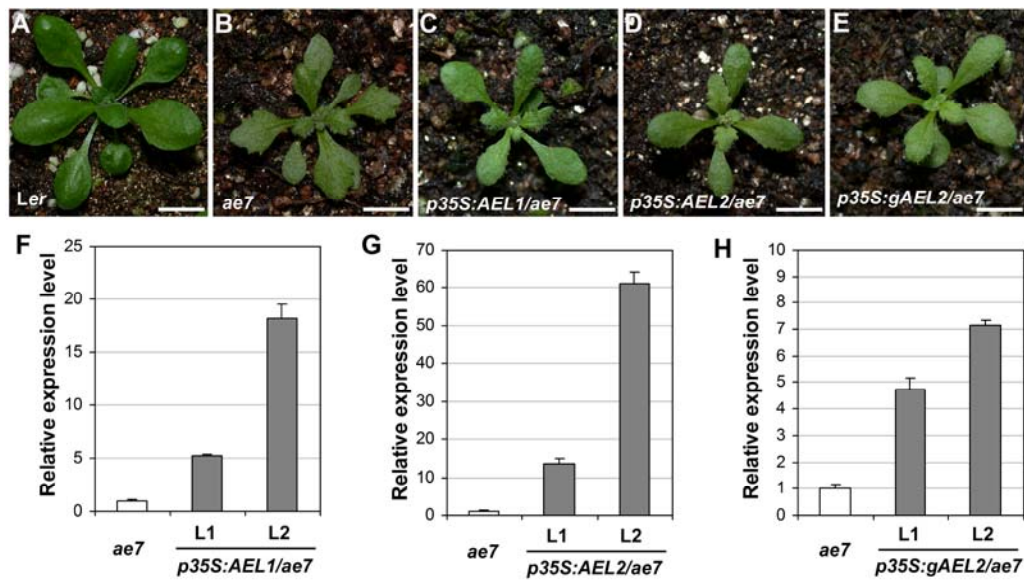

**Supplemental Figure 9.** The *ae7* phenotype could not be rescued by *Arabidopsis* *AE7*-like genes, *AEL1* (*At3g50845*) and *AEL2* (*At3g09380*), respectively. (A) The wild-type *Ler*. (B) The *ae7* mutant. (C-E) The representative transgenic *ae7* plant expressing the *AEL1* coding region (C), *AEL2* coding region (D) or *AEL2* genomic fragment (E) driven by the *p35S* promoter. (F-H) qRT-PCR analysis of *AEL1* (F) and *AEL2* expression (G, H) in the corresponding transgenic plants. Bars in (A-E), 1 cm.

**Supplemental data. Luo et al. Plant Cell. (2012). 10.1105/tpc.112.102608**

**Supplemental Table 1.** Sequences of oligonucleotide primers used in this study.

| Name        | Gene or mutant | Sequence (5'-3')                    | Purpose |
|-------------|----------------|-------------------------------------|---------|
| ACTIN-F     | <i>ACTIN</i>   | TGGCATCA(T/C)ACTTTCTACAA            | qPCR    |
| ACTIN-R     | <i>ACTIN</i>   | CCACCACT(G/A/T)AGCACAATGTT          | qPCR    |
| BRCA1-realF | <i>BRCA1</i>   | CCATGTATTTTGCAATGCGTG               | qPCR    |
| BRCA1-realR | <i>BRCA1</i>   | TGTGGAGCACCTCGAATCTCT               | qPCR    |
| RAD51-realF | <i>RAD51</i>   | CGAGGAAGGATCTCTTGCAG                | qPCR    |
| RAD51-realR | <i>RAD51</i>   | GCACTAGTGAACCCAGAGG                 | qPCR    |
| PARP1-realF | <i>PARP1</i>   | TGCTCGCGGAACTCACTTCT                | qPCR    |
| PARP1-realR | <i>PARP1</i>   | AGCCTCTCCACCAGAACGGCT               | qPCR    |
| PARP2-realF | <i>PARP2</i>   | ATGGCGTTCTGCTCCTCTGC                | qPCR    |
| PARP2-realR | <i>PARP2</i>   | GGTGCTGTTTTCCCCACACC                | qPCR    |
| WEE1-realF  | <i>WEE1</i>    | TGGTGCTGGACATTTTCAGTCGG             | qPCR    |
| WEE1-realR  | <i>WEE1</i>    | CAAGAGCTTGCCTTCCATCATAG             | qPCR    |
| CYCB1;1-F   | <i>CYCB1;1</i> | CAGACCATGCATACAGTCAC                | qPCR    |
| CYCB1;1-R   | <i>CYCB1;1</i> | TCCTAACTCCTAAGCAGATTC               | qPCR    |
| GR1-RTF     | <i>GR1</i>     | GAAGGAGCAGACAAAGTGAG                | qPCR    |
| GR1-RTR     | <i>GR1</i>     | GGTGAGATGGAAGTGATAGG                | qPCR    |
| LIG4-RTF    | <i>LIG4</i>    | GGTGGTCTCAATGTTCCCGCC               | qPCR    |
| LIG4-RTR    | <i>LIG4</i>    | AGGTCAGCACCAGCCCGGAT                | qPCR    |
| KU70-RTF    | <i>KU70</i>    | CGAGGACGACGTTGCAGAGAGC              | qPCR    |
| KU70-RTR    | <i>KU70</i>    | GCTGCCAGGAATAGCCGGACG               | qPCR    |
| KU80-RTF    | <i>KU80</i>    | GATGATGAAGACAATCGCATGATTA           | qPCR    |
| KU80-RTR    | <i>KU80</i>    | TTAGCTCTCGAGCATTGACTC               | qPCR    |
| RNR2A-RTF   | <i>AtRNR2A</i> | TGGCTCAGAACCAGAGATTC                | qPCR    |
| RNR2A-RTR   | <i>AtRNR2A</i> | AGAAACTGGCTTCAGCCTTC                | qPCR    |
| TSO2-RTF    | <i>AtTSO2</i>  | TCGCTTGTCTACTCTACACG                | qPCR    |
| TSO2-RTR    | <i>AtTSO2</i>  | CCGCGTCGCAGACGATTGA                 | qPCR    |
| RNR2B-RTF   | <i>AtRNR2B</i> | CTGGACAGCCGAAAAGTC                  | qPCR    |
| RNR2B-RTR   | <i>AtRNR2B</i> | AGTGACGTTTCGTCGTTGGTT               | qPCR    |
| ACO1-F      | <i>ACO1</i>    | CATTGAGCTCCCAAACAATGTTAGT           | qPCR    |
| ACO1-R      | <i>ACO1</i>    | TTATTGTTTGATCAAGTTCCTG              | qPCR    |
| ACO2-F      | <i>ACO2</i>    | ATGCCACCTTCTTACAAAAGTTAGT           | qPCR    |
| ACO2-R      | <i>ACO2</i>    | ATCACTTGGCGCTCAAACCTCC              | qPCR    |
| ACO3-F      | <i>ACO3</i>    | GATCCATCTCCCAAACCGATATCTCA          | qPCR    |
| ACO3-R      | <i>ACO3</i>    | CTATTGCTTGCTCAAGTTTCTG              | qPCR    |
| ROS1-F      | <i>ROS1</i>    | GGATCATGCATCCAGCCTAAACC             | qPCR    |
| ROS1-R      | <i>ROS1</i>    | TTAGGCGAGGTTAGCTTGTTGTC             | qPCR    |
| AEL1-RT-F   | <i>AEL1</i>    | CCGGAATTCATGACTCTGGGACTGAT<br>AAACG | qPCR    |
| AEL1-RT-R   | <i>AEL1</i>    | GACTAGTGCTATCTCATCGGAGTAGAT<br>AC   | qPCR    |
| AEL2-RT-F   | <i>AEL2</i>    | CCGGAATTCATGCGTTCAGGAGAGA           | qPCR    |

**Supplemental data. Luo et al. Plant Cell. (2012). 10.1105/tpc.112.102608**

|               |                  |                                            |               |
|---------------|------------------|--------------------------------------------|---------------|
| AEL2-RT-R     | <i>AEL2</i>      | GACTAGTGCAGATGCAAAGACCAATA<br>TG           | qPCR          |
| Salk_060584-F | <i>atcia1-1</i>  | GACAAGATGGTCACTTGTAG                       | T-DNA         |
| Salk_060584-R | <i>atcia1-1</i>  | GATTATATGAAGGTCCATCAAC                     | T-DNA         |
| CS16106-F     | <i>atcia1-2</i>  | CTGAAGAAGAATAAAGCACATG                     | T-DNA         |
| CS16106-R     | <i>atcia1-2</i>  | GCACCATCTAGCTTTCAACTCC                     | T-DNA         |
| Salk_121963-F | <i>atmet18-1</i> | CTTTGGAGAATGATTCTTTATC                     | T-DNA         |
| Salk_121963-R | <i>atmet18-1</i> | CATAGCATAAACAAGTAGATCAC                    | T-DNA         |
| Salk_147068-F | <i>atmet18-2</i> | GAATTCCCAGACTTCACTATCGAG                   | T-DNA         |
| Salk_147068-R | <i>atmet18-2</i> | CATTAGATGCGGATATGATGTAAG                   | T-DNA         |
| GK_674D01-F   | <i>atnar1-1</i>  | TGGTACCGAATTCATGTCAGAGA AGT<br>TTTCACC GAC | T-DNA         |
| GK_674D01-R   | <i>atnar1-1</i>  | GATCGCAGCTCCAATAGCTTGCTG                   | T-DNA         |
| GK_462G04-F   | <i>atnar1-2</i>  | GAGATCTTTATGGTGTAGCTGGGAG                  | T-DNA         |
| GK_462G04-R   | <i>atnar1-2</i>  | GTCGACGGATCCCCAGTTGTTGAGCT<br>GCGACGTA     | T-DNA         |
| GT6615-F      | <i>ae7-2</i>     | GAGGTTACACAGACCTACTCCTC                    | DS-Transposon |
| GT6615-R      | <i>ae7-2</i>     | CCGCTCGAGCGGTCCTCTTCTGATG<br>GCAGGCATTC    | DS-Transposon |
| XBAT34-F      | <i>XBAT34</i>    | GTTTGAAGCATATCTCCTCTATG                    | McrBC-PCR     |
| XBAT34-R      | <i>XBAT34</i>    | AGGTCGTTATTTGTTTCATCGGTG                   | McrBC-PCR     |
| MRD1-F        | <i>MRD1</i>      | GTCCGTTTTAGGCTTAGGACCG                     | McrBC-PCR     |
| MRD1-R        | <i>MRD1</i>      | GAAAACATTTCTAGCACAAAGAAA                   | McrBC-PCR     |

---

**Supplemental References**

**Sweetlove, L.J., Taylor, N.L., and Leaver, C.J. (2007).** Isolation of intact, functional mitochondria from the model plant *Arabidopsis thaliana*. *Methods Mol. Biol.* **372**: 125-136.
